# Supplementary material for: SARS-CoV-2 vaccination, ABO blood group and risk of COVID-19: population-based cohort study
Source: HighWire-hosted journal article supplement (doi:10.1136/bmjopen-2021-059944), 2022-07-01
Supplement: bmjopen-2021-059944supp001_data_supplement.pdf [file bmjopen-2021-059944supp001_data_supplement.pdf]

**Table S1. Variables used to define cohort entry and exclusion criteria, as well as study exposures, outcomes, adjustment, and stratification.**

| Assessment                | Timing                                                        | Disease, procedure or condition                                                                        | CIHI-DAD, SDS or NACRS ICD-10-CA diagnosis or CCI procedure codes | OHIP ICD-9 diagnosis or fee codes; or other data source                                                                                                                                                                                                                                                                                                                                                                                         | Validation studies or documentation for some codes                                                                                                                                                                                                           |
|---------------------------|---------------------------------------------------------------|--------------------------------------------------------------------------------------------------------|-------------------------------------------------------------------|-------------------------------------------------------------------------------------------------------------------------------------------------------------------------------------------------------------------------------------------------------------------------------------------------------------------------------------------------------------------------------------------------------------------------------------------------|--------------------------------------------------------------------------------------------------------------------------------------------------------------------------------------------------------------------------------------------------------------|
| <i>Inclusion criteria</i> | ABO-Rh specimen date January 2007 to December 2020            | Individuals with an ABO blood group test result in Ontario, Canada                                     | --                                                                | LOINC codes 882-1, 883-9, 10331-7 in the Ontario Laboratory Information System ( <a href="#">OLIS</a> ) - includes most outpatient laboratory information in Ontario                                                                                                                                                                                                                                                                            | --                                                                                                                                                                                                                                                           |
| <i>Exclusion criteria</i> | SARS-CoV-2 specimen date January 15, 2020 to January 14, 2021 | Individuals with a SARS-CoV-2 RNA PCR positive laboratory result in Ontario, Canada prior to time zero | --                                                                | OLISC19 - includes Test Request (TR)/LOINC codes for SARS-CoV-2 and other respiratory virus testing: TR12936-1, TR12937-9, 94315-9, 94314-2, 94316-7, XON13512-9, XON13529-3, XON13528-5, XON13531-9, XON13527-7. These codes, plus keywords such as "COVID", "SARS-CoV-2", "Novel coronavirus" or "nCOV" or microorganism SNOMED codes (840533007 [SARS-CoV-2], 168209000 [No Virus Identified]), were used to define the data pull from OLIS. | For the ICES methodology and Python script for cleaning and parsing OLIS lab results for SARS-CoV-2 and other respiratory viruses, see <a href="https://github.com/icescentral/C-OVID19-Lab-Results">https://github.com/icescentral/C-OVID19-Lab-Results</a> |
|                           | January 15, 2021 (time zero)                                  | Implausible or missing sex, birth date or death date                                                   | --                                                                | Registered Persons Database ( <a href="#">RPDB</a> ) - contains demographic information and encrypted healthcare numbers for all individuals eligible for OHIP                                                                                                                                                                                                                                                                                  | --                                                                                                                                                                                                                                                           |
|                           | Same as above                                                 | Non-Ontario resident or not eligible for OHIP at time zero                                             | --                                                                | RPDB                                                                                                                                                                                                                                                                                                                                                                                                                                            | --                                                                                                                                                                                                                                                           |
|                           | Same as above                                                 | Aged less < 12 years at time zero                                                                      | --                                                                | RPDB                                                                                                                                                                                                                                                                                                                                                                                                                                            | --                                                                                                                                                                                                                                                           |

| Assessment                     | Timing                                                                                                                            | Disease, procedure or condition                                                                             | CIHI-DAD, SDS or NACRS ICD-10-CA diagnosis or CCI procedure codes                  | OHIP ICD-9 diagnosis or fee codes; or other data source | Validation studies or documentation for some codes |
|--------------------------------|-----------------------------------------------------------------------------------------------------------------------------------|-------------------------------------------------------------------------------------------------------------|------------------------------------------------------------------------------------|---------------------------------------------------------|----------------------------------------------------|
|                                | Same as above                                                                                                                     | Death occurred before baseline, before the vaccination date, or > 1 day before the SARS-CoV-2 specimen date | Discharge disposition is not alive ( <a href="#">DAD</a> , <a href="#">NACRS</a> ) | RPDB, COVAXON, OLISC19                                  | --                                                 |
|                                | December 15, 2020 to June 13, 2021                                                                                                | Duplicate vaccination record                                                                                | --                                                                                 | COVAXON                                                 | --                                                 |
| <i>Study exposures</i>         | December 15, 2020 to June 13, 2021                                                                                                | COVID-19 partially vaccinated status                                                                        | --                                                                                 | COVAXON                                                 | --                                                 |
|                                | Same as above                                                                                                                     | COVID-19 1 <sup>st</sup> dose type (mRNA, viral vector, unknown, none)                                      | --                                                                                 | COVAXON                                                 | --                                                 |
|                                | Same as above                                                                                                                     | COVID-19 fully-vaccinated status (fully-vaccinated, partially-vaccinated, unvaccinated)                     | --                                                                                 | COVAXON                                                 | --                                                 |
| <i>Stratification variable</i> | January 2007 to December 2020                                                                                                     | ABO blood group (O, other)                                                                                  | --                                                                                 | LOINC codes 882-1, 883-9, 10331-7 in OLIS               | --                                                 |
| <i>Main study outcome</i>      | SARS-CoV-2 specimen date January 15, 2021 (time zero) to June 27, 2021, censored at loss OHIP eligibility or the day after death. | Earliest SARS-CoV-2 positive test.                                                                          | --                                                                                 | OLISC19                                                 | --                                                 |

| Assessment                     | Timing                                                                                                                            | Disease, procedure or condition                                                                                                                    | CIHI-DAD, SDS or NACRS ICD-10-CA diagnosis or CCI procedure codes                                                                                                                                                                                                 | OHIP ICD-9 diagnosis or fee codes; or other data source         | Validation studies or documentation for some codes                                                |
|--------------------------------|-----------------------------------------------------------------------------------------------------------------------------------|----------------------------------------------------------------------------------------------------------------------------------------------------|-------------------------------------------------------------------------------------------------------------------------------------------------------------------------------------------------------------------------------------------------------------------|-----------------------------------------------------------------|---------------------------------------------------------------------------------------------------|
| <i>Secondary study outcome</i> | SARS-CoV-2 specimen date January 15, 2021 (time zero) to June 30, 2021, censored at loss OHIP eligibility or the day after death. | Earliest SARS-CoV-2 positive test <u>AND</u> a hospital admission within -/+ 3 days or death within -1 to +3 days of the SARS-CoV-2 specimen date. | DAD (hospital admission, not alive at discharge), NACRS (hospital admission, not alive at discharge), SDS (not alive at discharge)                                                                                                                                | OLISC19 (SARS-CoV-2 test), RPDB (death)                         | --                                                                                                |
| <i>Covariates</i>              | January 15, 2021 (time zero)                                                                                                      | Age                                                                                                                                                | --                                                                                                                                                                                                                                                                | RPDB                                                            | --                                                                                                |
|                                | Same as above                                                                                                                     | Sex                                                                                                                                                | --                                                                                                                                                                                                                                                                | RPDB                                                            | --                                                                                                |
|                                | Same as above                                                                                                                     | Area income quintile                                                                                                                               | --                                                                                                                                                                                                                                                                | Statistics Canada <a href="#">Census</a>                        | --                                                                                                |
|                                | Same as above                                                                                                                     | Rural residence                                                                                                                                    | --                                                                                                                                                                                                                                                                | Statistics Canada <a href="#">Census</a>                        | --                                                                                                |
|                                | Any time before January 15, 2021 (time zero)                                                                                      | Diabetes mellitus                                                                                                                                  | The ICES-derived <a href="#">ODD</a> database was used to identify patients with diagnosed diabetes before the index date, based on 2 OHIP diagnostic codes or 1 OHIP fee code or 1 DAD/SDS diagnostic code, within 2 years.<br><br>ICD-10-CA: E10, E11, E13, E14 | OHIP ICD-9: 250<br>OHIP fee codes: Q040, K029, K030, K045, K046 | <a href="https://pubmed.ncbi.nlm.nih.gov/11874939/">https://pubmed.ncbi.nlm.nih.gov/11874939/</a> |

| Assessment | Timing                                             | Disease, procedure or condition | CIHI-DAD, SDS or NACRS ICD-10-CA diagnosis or CCI procedure codes                                                                                                                                                                                                                           | OHIP ICD-9 diagnosis or fee codes; or other data source | Validation studies or documentation for some codes                                                |
|------------|----------------------------------------------------|---------------------------------|---------------------------------------------------------------------------------------------------------------------------------------------------------------------------------------------------------------------------------------------------------------------------------------------|---------------------------------------------------------|---------------------------------------------------------------------------------------------------|
|            | Same as above                                      | History of heart failure        | The ICES-derived <a href="#">CHF</a> database was used to identify patients with CHF, based on 1 ED, hospitalization or outpatient claim, and a second claim in 1 year. <i>The CHF database is limited to those 40 years of age or older.</i><br><br>ICD-10-CA (DAD, SDS): I500, I501, I509 | OHIP ICD-9: 428                                         | <a href="https://pubmed.ncbi.nlm.nih.gov/23735455/">https://pubmed.ncbi.nlm.nih.gov/23735455/</a> |
|            | Within 5 years before January 15, 2021 (time zero) | History of malignant neoplasm   | ICD-10-CA (DAD, SDS, NACRS): C00-C97                                                                                                                                                                                                                                                        | --                                                      | --                                                                                                |
|            | Same as above                                      | Chronic kidney disease (CKD)    | <u>CKD diagnosis</u><br>ICD-10-CA (DAD, NACRS): E102, E112, E132, E142, I12, I13, N08, N18, N19                                                                                                                                                                                             | <u>CKD diagnosis</u><br>ICD-9 (OHIP): 403, 585          | <a href="https://pubmed.ncbi.nlm.nih.gov/23560464/">https://pubmed.ncbi.nlm.nih.gov/23560464/</a> |

| Assessment | Timing | Disease, procedure or condition | CIHI-DAD, SDS or NACRS ICD-10-CA diagnosis or CCI procedure codes                                                                                             | OHIP ICD-9 diagnosis or fee codes; or other data source                                                                                                                                                                                                                                                                                                                                                                                                           | Validation studies or documentation for some codes                                                |
|------------|--------|---------------------------------|---------------------------------------------------------------------------------------------------------------------------------------------------------------|-------------------------------------------------------------------------------------------------------------------------------------------------------------------------------------------------------------------------------------------------------------------------------------------------------------------------------------------------------------------------------------------------------------------------------------------------------------------|---------------------------------------------------------------------------------------------------|
|            |        |                                 | <u>Chronic dialysis</u><br>At least 2 of the following CCI (DAD, SDS) codes separated by 90 days, but < 150 days, in the year before the index date:<br>1PZ21 | <u>Chronic dialysis</u><br>At least 2 of the following OHIP fee codes separated by 90 days, but < 150 days, in the year before the index date: R849, G082, G083, G085, G090-G096, G294, G295, G323, G325, G326, G330-G333, G860-G866, H540, H740<br><br>Treatment codes ( <u>CORR</u> ): 060, 111, 112, 113, 121, 122, 123, 131, 132, 133, 141, 151, 152, 211, 221, 231, 241, 242, 251, 252, 311, 312, 313, 321, 322, 323, 331, 332, 333, 413, 423, 433, 443, 453 | <a href="https://pubmed.ncbi.nlm.nih.gov/20613656/">https://pubmed.ncbi.nlm.nih.gov/20613656/</a> |
|            |        |                                 | <u>Exclude kidney transplant CCI (DAD): 1PC85</u>                                                                                                             | <u>Exclude kidney transplant</u><br>OHIP fee codes: S435, S434<br><br>CORR treatment code: 171 plus $\geq 1$ Transplanted Organ Code [1-3]: 10, 11, 12, 18, 19                                                                                                                                                                                                                                                                                                    | <a href="https://pubmed.ncbi.nlm.nih.gov/26019887/">https://pubmed.ncbi.nlm.nih.gov/26019887/</a> |

| Assessment | Timing        | Disease, procedure or condition | CIHI-DAD, SDS or NACRS ICD-10-CA diagnosis or CCI procedure codes                                                                                                                                                                                                                                                                                                                                                                                                            | OHIP ICD-9 diagnosis or fee codes; or other data source | Validation studies or documentation for some codes                                                |
|------------|---------------|---------------------------------|------------------------------------------------------------------------------------------------------------------------------------------------------------------------------------------------------------------------------------------------------------------------------------------------------------------------------------------------------------------------------------------------------------------------------------------------------------------------------|---------------------------------------------------------|---------------------------------------------------------------------------------------------------|
|            | Same as above | History of cardiac ischemia     | <p>At least 1 hospitalization (DAD) or ED (NACRS) visit with a diagnosis or procedure coded with 1 of the following codes:</p> <p><u>Angina:</u><br/>ICD-10-CA: I20, I2382, I24</p> <p><u>Chronic Ischemic Heart Disease:</u><br/>ICD-10-CA: I25</p> <p><u>Myocardial infarction:</u><br/>ICD-10-CA: I21, I22</p> <p><u>Coronary Artery Bypass Grafting:</u><br/>CCI: 1IJ76, 1IJ80</p> <p><u>Percutaneous Coronary Intervention:</u><br/>CCI: 1IJ26, 1IJ50, 1IJ55, 1IJ57</p> | --                                                      | <a href="https://pubmed.ncbi.nlm.nih.gov/20847972/">https://pubmed.ncbi.nlm.nih.gov/20847972/</a> |

| Assessment | Timing        | Disease, procedure or condition | CIHI-DAD, SDS or NACRS ICD-10-CA diagnosis or CCI procedure codes                                                                                                                                                                                                                                                                                                                                                                                                                                                        | OHIP ICD-9 diagnosis or fee codes; or other data source | Validation studies or documentation for some codes                                                                                                                                                                                                                                                                                                                                                                                                   |
|------------|---------------|---------------------------------|--------------------------------------------------------------------------------------------------------------------------------------------------------------------------------------------------------------------------------------------------------------------------------------------------------------------------------------------------------------------------------------------------------------------------------------------------------------------------------------------------------------------------|---------------------------------------------------------|------------------------------------------------------------------------------------------------------------------------------------------------------------------------------------------------------------------------------------------------------------------------------------------------------------------------------------------------------------------------------------------------------------------------------------------------------|
|            | Same as above | History of cardiac arrhythmia   | <p>At least 1 hospitalization (DAD) or ED (NACRS) visit with a diagnosis or procedure coded with 1 of the following codes:</p> <p><u>Atrial Fibrillation/Atrial Flutter:</u><br/>ICD-10-CA: I48</p> <p><u>Ventricular Arrhythmia &amp; Tachycardia:</u><br/>ICD-10-CA: I470, I472, I490, I493</p> <p><u>Permanent Pacemaker:</u><br/>CCI: 1HZ53GRNM, 1HZ53LANM, 1HZ53GRNK, 1HZ53LANK, 1HZ53GRNL, 1HZ53LANL</p> <p><u>Implantable Cardioverter-Defibrillator:</u><br/>CCI: 1HZ53GRFS, 1HZ53LAFS, 1HZ53SYFS, 1HZ53HAFS</p> | --                                                      | <p><a href="https://pubmed.ncbi.nlm.nih.gov/19433698/">https://pubmed.ncbi.nlm.nih.gov/19433698/</a></p> <p><a href="https://www.ices.on.ca/Publications/Atlases-and-Reports/2006/Canadian-Institute-for-Health-Information">https://www.ices.on.ca/Publications/Atlases-and-Reports/2006/Canadian-Institute-for-Health-Information</a></p> <p><a href="https://pubmed.ncbi.nlm.nih.gov/17599603/">https://pubmed.ncbi.nlm.nih.gov/17599603/</a></p> |

| Assessment | Timing        | Disease, procedure or condition                                                      | CIHI-DAD, SDS or NACRS ICD-10-CA diagnosis or CCI procedure codes                                                                                                                                                                                                                                                                                                                                                                                                                                                                                                                                                                                        | OHIP ICD-9 diagnosis or fee codes; or other data source                                                                                                                                                                                                                                                                                                              | Validation studies or documentation for some codes |
|------------|---------------|--------------------------------------------------------------------------------------|----------------------------------------------------------------------------------------------------------------------------------------------------------------------------------------------------------------------------------------------------------------------------------------------------------------------------------------------------------------------------------------------------------------------------------------------------------------------------------------------------------------------------------------------------------------------------------------------------------------------------------------------------------|----------------------------------------------------------------------------------------------------------------------------------------------------------------------------------------------------------------------------------------------------------------------------------------------------------------------------------------------------------------------|----------------------------------------------------|
|            | Same as above | History of pulmonary embolism, deep vein thrombosis, or other venous thromboembolism | <p>ICD-10-CA (DAD, SDS, NACRS): I260, I269, O88201, O88202, O88203, O88204, O88209, I636, I822, I828, I829, I801, I802, I803, I808, I809, O22301, O22303, O22309, O22501, O22503, O22509, O87102, O87104, O87109, O87304, O87309, I676, I81, I820, I823, O228, O229, O878, O879</p> <p><u>AND</u></p> <p>one of the following CCI codes for diagnostic imaging during the same admission: 3KX30DA, 3KX30DB, 3KX30DC, 3KX30DD, 3KR10VC, 3KR10VN, 3KR12VA, 3KX10VA, 3KX10VC, 3KX10VN, 3KX10VX, 3KX12VA, 3IM10VC, 3IM10VX, 3IM10VY, 3IM12VA, 3GT70CA, 3GT70CC, 3GT70CE, 3GT70KC, 3GT70KD, 3GT70KE, 3JY10VA, 3JY10VC, 3JY10VN, 3JY10VX, 3JY12VA, 3JY20WC</p> | <p>OHIP ICD-9: 677, 415, 671, 451, 452</p> <p><u>AND</u></p> <p>one of the following OHIP radiological professional fee codes for a VTE diagnostic test billed within 3 days: J198, J498, J193, J493, J202, J502, J206, J506, J182, J482, X406, X407, X125, X188, X401, X405, X408, X126, X410, X231, X232, X233, X127, X413, X421, X425, J659, J660, J859, J860</p> | --                                                 |

| Assessment                      | Timing                                       | Disease, procedure or condition              | CIHI-DAD, SDS or NACRS ICD-10-CA diagnosis or CCI procedure codes                                                                                                                                                                                                                                                                                   | OHIP ICD-9 diagnosis or fee codes; or other data source | Validation studies or documentation for some codes                                                                                                                  |
|---------------------------------|----------------------------------------------|----------------------------------------------|-----------------------------------------------------------------------------------------------------------------------------------------------------------------------------------------------------------------------------------------------------------------------------------------------------------------------------------------------------|---------------------------------------------------------|---------------------------------------------------------------------------------------------------------------------------------------------------------------------|
| <i>Other baseline variables</i> | Any time before January 15, 2021 (time zero) | Asthma                                       | The ICES-derived <a href="#">ASTHMA</a> database was used to identify patients with diagnosed asthma before the index date, based on 2 OHIP diagnostic codes or 1 DAD diagnostic code.<br><br>ICD-10-CA: J45, J46                                                                                                                                   | OHIP ICD-9: 493                                         | <a href="https://pubmed.ncbi.nlm.nih.gov/20011725/">https://pubmed.ncbi.nlm.nih.gov/20011725/</a>                                                                   |
|                                 | Same as above                                | Chronic obstructive pulmonary disease (COPD) | The ICES-derived <a href="#">COPD</a> database was used to identify patients with diagnosed COPD before the index date, based on 1 OHIP diagnostic code or 1 DAD diagnostic code.<br><br>ICD-10-CA: J41-J44                                                                                                                                         | OHIP ICD-9: 491, 492, 496                               | <a href="https://pubmed.ncbi.nlm.nih.gov/19863368/">https://pubmed.ncbi.nlm.nih.gov/19863368/</a> <i>The COPD algorithm was validated in those aged ≥ 35 years.</i> |
|                                 | Same as above                                | Chronic hypertension                         | The ICES-derived <a href="#">HYPER</a> database was used to identify patients with:<br>a) 1 hospital admission with a hypertension diagnosis, or<br>b) an OHIP claim with a hypertension diagnosis followed within 2 years by either an OHIP claim or a hospital admission with a hypertension diagnosis.<br><br>ICD-10-CA (DAD, SDS): I10-I13, I15 | OHIP ICD-9: 401-405                                     | <a href="https://pubmed.ncbi.nlm.nih.gov/20101286/">https://pubmed.ncbi.nlm.nih.gov/20101286/</a>                                                                   |

| Assessment | Timing        | Disease, procedure or condition             | CIHI-DAD, SDS or NACRS ICD-10-CA diagnosis or CCI procedure codes                                                                                                                                                                                                                        | OHIP ICD-9 diagnosis or fee codes; or other data source                                                                                                                                                                                                                                                                              | Validation studies or documentation for some codes                                                |
|------------|---------------|---------------------------------------------|------------------------------------------------------------------------------------------------------------------------------------------------------------------------------------------------------------------------------------------------------------------------------------------|--------------------------------------------------------------------------------------------------------------------------------------------------------------------------------------------------------------------------------------------------------------------------------------------------------------------------------------|---------------------------------------------------------------------------------------------------|
|            | Same as above | Immunocompromised (HIV or organ transplant) | --                                                                                                                                                                                                                                                                                       | <p>The ICES-derived <a href="#">HIV</a> database was used to identify patients with pre-existing HIV, based on 3 physician claims in 3 years.</p> <p>OHIP ICD-9: 042-044</p> <p><a href="#">CORRLINK</a> links CORR and DAD data and includes patients who received an organ transplant, and does not include dialysis patients.</p> | <a href="https://pubmed.ncbi.nlm.nih.gov/21738786/">https://pubmed.ncbi.nlm.nih.gov/21738786/</a> |
|            | Same as above | Dementia                                    | <p>The ICES-derived <a href="#">DEMENTIA</a> database was used to identify individuals with 1 hospitalization for dementia and/or 3 outpatient visits for dementia, each separated by 30 days, within 2 years, or 1 prescription from ODB.</p> <p>ICD-10-CA (DAD, SDS): F00-F03, G30</p> | <p>OHIP ICD-9: 290, 331</p> <p><a href="#">ODB</a></p> <p>1 prescription for a cholinesterase inhibitor</p>                                                                                                                                                                                                                          | <a href="https://pubmed.ncbi.nlm.nih.gov/27567819/">https://pubmed.ncbi.nlm.nih.gov/27567819/</a> |

| Assessment | Timing                                             | Disease, procedure or condition | CIHI-DAD, SDS or NACRS ICD-10-CA diagnosis or CCI procedure codes                                                                                                                                                                                                                                                                                                                                                                                                                                                                                                            | OHIP ICD-9 diagnosis or fee codes; or other data source | Validation studies or documentation for some codes                                                |
|------------|----------------------------------------------------|---------------------------------|------------------------------------------------------------------------------------------------------------------------------------------------------------------------------------------------------------------------------------------------------------------------------------------------------------------------------------------------------------------------------------------------------------------------------------------------------------------------------------------------------------------------------------------------------------------------------|---------------------------------------------------------|---------------------------------------------------------------------------------------------------|
|            | Within 1 year before January 15, 2021 (time zero)  | Frailty                         | Identified based on the following rules, using DAD and OHIP databases:<br>1. Long-term care residence (i.e., admitted from/discharged to, a nursing home after hospital stay, or location of physician billing claim was long-term care facility);<br>2. Receipt of palliative care;<br>3. Two or more domains derived from frailty scales (i.e., cognitive impairment, falls, general health status, incontinence, nutrition issues, functional performance) and health services utilization (i.e., $\geq 2$ hospital stays or ED visits, geriatrician or home care visit). | --                                                      | <a href="https://pubmed.ncbi.nlm.nih.gov/28974280/">https://pubmed.ncbi.nlm.nih.gov/28974280/</a> |
|            | Within 5 years before January 15, 2021 (time zero) | Anemia                          | ICD-10-CA (DAD, SDS, NACRS): D50-D53, D55, D56, D572-D574, D58-D61, D63, P55, P560, P570                                                                                                                                                                                                                                                                                                                                                                                                                                                                                     | OHIP ICD-9: 280-285, 773                                | --                                                                                                |

| Assessment | Timing        | Disease, procedure or condition                               | CIHI-DAD, SDS or NACRS ICD-10-CA diagnosis or CCI procedure codes                                                                                                                                                                                                                                                                                                        | OHIP ICD-9 diagnosis or fee codes; or other data source | Validation studies or documentation for some codes                                                                                                                              |
|------------|---------------|---------------------------------------------------------------|--------------------------------------------------------------------------------------------------------------------------------------------------------------------------------------------------------------------------------------------------------------------------------------------------------------------------------------------------------------------------|---------------------------------------------------------|---------------------------------------------------------------------------------------------------------------------------------------------------------------------------------|
|            | Same as above | History of transient ischemic attack or acute ischemic stroke | <p><u>Transient Ischemic Attack:</u><br/>At least 1 hospitalization or ED visit with 1 of the following diagnosis codes:</p> <p>ICD-10-CA (DAD, NACRS):<br/>G450-G453, G458, G459, H340</p> <p><u>Acute Ischemic Stroke:</u><br/>1 hospitalization with a main diagnosis coded with one of the following codes:</p> <p>ICD-10-CA (DAD): I63 (except I636), I64, H341</p> | --                                                      | <a href="http://canadiansrokenetwork.ca/en/wp-content/uploads/2014/08/Stroke_Core_ENG.pdf">http://canadiansrokenetwork.ca/en/wp-content/uploads/2014/08/Stroke_Core_ENG.pdf</a> |

ASTHMA: Ontario Asthma dataset; CCI: Canadian Classification of Interventions; CHF: Ontario Congestive Heart Failure dataset; CIHI: Canadian Institute for Health Information; CORR: Canadian Organ Replacement Registry; COVAXON: Ontario COVID-19 Vaccine Data; DAD: Discharge Abstract Database; DEMENTIA: Ontario Dementia dataset; ED: Emergency Department; HIV: Ontario HIV dataset; HYPER: Ontario Hypertension dataset; ICD-9: International Classification of Diseases, 9th Revision; ICD-10-CA: International Classification of Diseases, 10th Revision, Canada; ICU: Intensive Care Unit; LHIN: Local Health Integration Network; LOINC: Logical Observation Identifiers Names and Codes; NACRS: National Ambulatory Care Reporting System; ODB: Ontario Drug Benefit; ODD: Ontario Diabetes Dataset; OHIP: Ontario Health Insurance Plan; OLIS: Ontario Laboratories Information System; OLISC19: Ontario Laboratories Information System COVID-19 Laboratory Data; RPDB: Registered Persons Database; SDS: Same Day Surgery

**Figure S1. Study cohort creation.**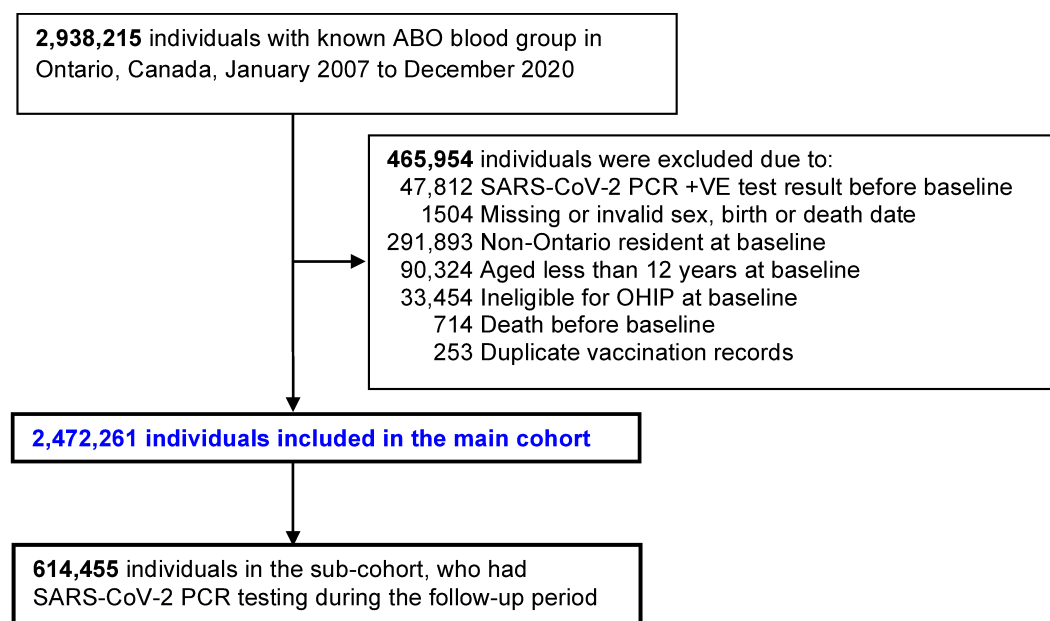

**Table S2 (Additional analysis 1). SARS-CoV-2 vaccination and associated risk of SARS-CoV-2 infection, or severe COVID-19 (hospitalization or death) – each assessed starting at least 14 days after the first vaccination. This analysis is limited to 614,455 individuals who had SARS-CoV-2 PCR testing during the follow-up period, from January 15, 2021 onward.**

| Study outcome        | Exposure state <sup>a</sup> | No. person-days of follow-up <sup>a</sup> | No. with outcome (rate per 10,000 person-days) | Unadjusted hazard ratio (95% CI%) | Adjusted hazard ratio (95% CI%) <sup>b</sup> |
|----------------------|-----------------------------|-------------------------------------------|------------------------------------------------|-----------------------------------|----------------------------------------------|
| SARS-CoV-2 infection | Unvaccinated (N = 609,129)  | 67,185,613                                | 51,187 (7.62)                                  | 1.00 (referent)                   | 1.00 (referent)                              |
|                      | Vaccinated (N = 439,058)    | 27,220,438                                | 4995 (1.84)                                    | 0.25 (0.25 to 0.26)               | 0.28 (0.27 to 0.29)                          |
|                      |                             |                                           |                                                |                                   |                                              |
| Severe COVID-19      | Unvaccinated (N = 609,129)  | 71,414,615                                | 2890 (0.40)                                    | 1.00 (referent)                   | 1.00 (referent)                              |
|                      | Vaccinated (N = 439,058)    | 27,470,663                                | 491 (0.18)                                     | 0.50 (0.46 to 0.56)               | 0.22 (0.20 to 0.25)                          |

<sup>a</sup>Exposure is time-varying, therefore, some individuals may have contributed time as unvaccinated, and then subsequently, as vaccinated.

<sup>b</sup>Adjusted for age, sex, rural residence, area income quintile – each at baseline -- as well as prior diabetes mellitus, malignancy, heart failure, cardiac ischemia or arrhythmia, chronic kidney disease or venous thromboembolism.

**Table S3. SARS-CoV-2 vaccination and associated risk of SARS-CoV-2 infection, or severe COVID-19 (hospitalization or death), stratified by O and non-O blood groups, among the entire cohort.** Data are presented by time-varying exposure after first vaccination type vs. unvaccinated, with study outcomes assessed starting at least 14 days after the first vaccination.

| Study outcome        | Stratified by blood group | Exposure state <sup>a</sup>      | No. person-days of follow-up <sup>a</sup> | No. with outcome (rate per 10,000 person-days) | Adjusted hazard ratio (95% CI) <sup>b</sup> |
|----------------------|---------------------------|----------------------------------|-------------------------------------------|------------------------------------------------|---------------------------------------------|
| SARS-CoV-2 infection | Non-O                     | Unvaccinated (N = 1,401,213)     | 172,490,490                               | 30,685 (1.78)                                  | 1.00 (referent)                             |
|                      |                           | Adenovirus-vectored (N = 80,411) | 4,637,314                                 | 260 (0.56)                                     | 0.49 (0.43 to 0.55)                         |
|                      |                           | Modified RNA (N = 912,274)       | 48,108,108                                | 2717 (0.56)                                    | 0.46 (0.44 to 0.48)                         |
|                      | O                         | Unvaccinated (N = 1,063,785)     | 130,718,702                               | 20,502 (1.57)                                  | 1.00 (referent)                             |
|                      |                           | Adenovirus-vectored (N = 62,947) | 3,626,421                                 | 174 (0.48)                                     | 0.49 (0.42 to 0.57)                         |
|                      |                           | Modified RNA (N = 688,250)       | 36,951,138                                | 1844 (0.50)                                    | 0.46 (0.44 to 0.48)                         |
|                      |                           |                                  |                                           |                                                |                                             |
|                      |                           |                                  |                                           |                                                |                                             |
|                      |                           |                                  |                                           |                                                |                                             |
| Severe COVID-19      | Non-O                     | Unvaccinated (N = 1,401,213)     | 175,034,046                               | 1677 (0.10)                                    | 1.00 (referent)                             |
|                      |                           | Adenovirus-vectored (N = 80,411) | 4,649,419                                 | 15 (0.03)                                      | 0.27 (0.16 to 0.45)                         |
|                      |                           | Modified RNA (N = 912,274)       | 48,242,495                                | 296 (0.06)                                     | 0.31 (0.27 to 0.36)                         |
|                      | O                         | Unvaccinated (N = 1,063,785)     | 132,404,148                               | 1213 (0.09)                                    | 1.00 (referent)                             |
|                      |                           | Adenovirus-vectored (N = 62,947) | 3,634,743                                 | 12 (0.03)                                      | 0.33 (0.18 to 0.58)                         |
|                      |                           | Modified RNA (N = 688,250)       | 37,046,550                                | 168 (0.05)                                     | 0.27 (0.22 to 0.32)                         |
|                      |                           |                                  |                                           |                                                |                                             |
|                      |                           |                                  |                                           |                                                |                                             |
|                      |                           |                                  |                                           |                                                |                                             |

<sup>a</sup>Exposure is time-varying, therefore, some individuals may have contributed time as unvaccinated, and then subsequently, as vaccinated.

<sup>b</sup>Adjusted for age, sex, rural residence, area income quintile – each at baseline -- as well as prior diabetes mellitus, malignancy, heart failure, cardiac ischemia or arrhythmia, chronic kidney disease or venous thromboembolism.
